# Supplementary material
Source: HighWire-hosted journal article supplement (https://bmjopen.bmj.com/content/12/6/e059428)
Supplement: inline-supplementary-material-1 [file inline-supplementary-material-1.pdf]

### **OPTI-PREM observation framework**

The observer will take written notes during the observations within neonatal units. Key issues to be observed are as follows, but additional relevant information should also be recorded:

- What is the event or type of activity being observed?
- What context and setting are you in?
- How does optimal place of care feature in what you're observing?
- What role does/will it play?
  
- Who is involved and how is the interaction managed?
- How, when and why is optimal place of care made relevant to what you are observing?
- How is optimal place of care positioned relative to other relevant issues (e.g. unit capacity, parental experience)?
  
- How is the idea of optimal place of care introduced to parents, and how is it received?
- Is there broad agreement between parent and professional, or are there tensions?
  
- How are decisions made about optimal place of care?
- What factors influence this?
- What will happen after the episode you are observing?
  
- How are transfers of place of care managed?
- What factors facilitate this?
- What factors make this more difficult?

Version 1 29/08/17

IRAS 212034
